# Supplementary material for: Clonal dynamics and somatic evolution of haematopoiesis in mouse
Source: Springer Nature journal article supplement (doi:10.1038/s41586-025-08625-8), 2025-03-05
Supplement: MOESM2 [file 41586_2025_8625_MOESM2_ESM.pdf]

Reporting Summary

Nature Portfolio wishes to improve the reproducibility of the work that we publish. This form provides structure for consistency and transparency in reporting. For further information on Nature Portfolio policies, see our [Editorial Policies](#) and the [Editorial Policy Checklist](#).

Statistics

For all statistical analyses, confirm that the following items are present in the figure legend, table legend, main text, or Methods section.

|                                     |                                                                                                                                                                                                                                                                                                |
|-------------------------------------|------------------------------------------------------------------------------------------------------------------------------------------------------------------------------------------------------------------------------------------------------------------------------------------------|
| n/a                                 | Confirmed                                                                                                                                                                                                                                                                                      |
| <input type="checkbox"/>            | <input checked="" type="checkbox"/> The exact sample size ( <i>n</i> ) for each experimental group/condition, given as a discrete number and unit of measurement                                                                                                                               |
| <input type="checkbox"/>            | <input checked="" type="checkbox"/> A statement on whether measurements were taken from distinct samples or whether the same sample was measured repeatedly                                                                                                                                    |
| <input type="checkbox"/>            | <input checked="" type="checkbox"/> The statistical test(s) used AND whether they are one- or two-sided<br><i>Only common tests should be described solely by name; describe more complex techniques in the Methods section.</i>                                                               |
| <input checked="" type="checkbox"/> | <input type="checkbox"/> A description of all covariates tested                                                                                                                                                                                                                                |
| <input type="checkbox"/>            | <input checked="" type="checkbox"/> A description of any assumptions or corrections, such as tests of normality and adjustment for multiple comparisons                                                                                                                                        |
| <input type="checkbox"/>            | <input checked="" type="checkbox"/> A full description of the statistical parameters including central tendency (e.g. means) or other basic estimates (e.g. regression coefficient) AND variation (e.g. standard deviation) or associated estimates of uncertainty (e.g. confidence intervals) |
| <input type="checkbox"/>            | <input checked="" type="checkbox"/> For null hypothesis testing, the test statistic (e.g. <i>F</i> , <i>t</i> , <i>r</i> ) with confidence intervals, effect sizes, degrees of freedom and <i>P</i> value noted<br><i>Give P values as exact values whenever suitable.</i>                     |
| <input type="checkbox"/>            | <input checked="" type="checkbox"/> For Bayesian analysis, information on the choice of priors and Markov chain Monte Carlo settings                                                                                                                                                           |
| <input type="checkbox"/>            | <input checked="" type="checkbox"/> For hierarchical and complex designs, identification of the appropriate level for tests and full reporting of outcomes                                                                                                                                     |
| <input type="checkbox"/>            | <input checked="" type="checkbox"/> Estimates of effect sizes (e.g. Cohen's <i>d</i> , Pearson's <i>r</i> ), indicating how they were calculated                                                                                                                                               |

Our web collection on [statistics for biologists](#) contains articles on many of the points above.

Software and code

Policy information about [availability of computer code](#)

|                 |                                                                                                                                                                                                                                                                                                                                                                                                                                                                                                                                                                                                                                                                                                                                                                                                                                                                                                                                                                                                                                                                                                                                                                                                                                                                                                                                                                                                                                                                                                                                                                                                                                                                                                                                                                                                                                                                                                                                                                                                                                                                                                                                                                                                                                                                                                                                                                                                                                                                                                                                                                                                                                        |
|-----------------|----------------------------------------------------------------------------------------------------------------------------------------------------------------------------------------------------------------------------------------------------------------------------------------------------------------------------------------------------------------------------------------------------------------------------------------------------------------------------------------------------------------------------------------------------------------------------------------------------------------------------------------------------------------------------------------------------------------------------------------------------------------------------------------------------------------------------------------------------------------------------------------------------------------------------------------------------------------------------------------------------------------------------------------------------------------------------------------------------------------------------------------------------------------------------------------------------------------------------------------------------------------------------------------------------------------------------------------------------------------------------------------------------------------------------------------------------------------------------------------------------------------------------------------------------------------------------------------------------------------------------------------------------------------------------------------------------------------------------------------------------------------------------------------------------------------------------------------------------------------------------------------------------------------------------------------------------------------------------------------------------------------------------------------------------------------------------------------------------------------------------------------------------------------------------------------------------------------------------------------------------------------------------------------------------------------------------------------------------------------------------------------------------------------------------------------------------------------------------------------------------------------------------------------------------------------------------------------------------------------------------------------|
| Data collection | Flow cytometry data was collected using BD FACSDiva version 9.0 and analyzed using FlowJo version 10.8.1.                                                                                                                                                                                                                                                                                                                                                                                                                                                                                                                                                                                                                                                                                                                                                                                                                                                                                                                                                                                                                                                                                                                                                                                                                                                                                                                                                                                                                                                                                                                                                                                                                                                                                                                                                                                                                                                                                                                                                                                                                                                                                                                                                                                                                                                                                                                                                                                                                                                                                                                              |
| Data analysis   | SNVs and indels were detected using CaVEMan (version 1.14.0, <a href="https://github.com/cancerit/CaVEMan">https://github.com/cancerit/CaVEMan</a> ), cgppindel (version 3.9.0, <a href="https://github.com/cancerit/cgppindel">https://github.com/cancerit/cgppindel</a> ), and VarDict (version 1.8.3, <a href="https://github.com/AstraZeneca-NGS/VarDictJava">https://github.com/AstraZeneca-NGS/VarDictJava</a> ). Variants were annotated using VAGrENT (version 3.7.0, <a href="https://github.com/cancerit/VAGrENT">https://github.com/cancerit/VAGrENT</a> ), and Ensemble VEP (release 107-110.0, <a href="https://github.com/Ensembl/ensembl-vep">https://github.com/Ensembl/ensembl-vep</a> ). Phylogenies were constructed using MPBoot (version 1.1.0, <a href="https://github.com/diepithoang/mpboot">https://github.com/diepithoang/mpboot</a> ). Variants were assigned to phylogenies using Rtreemut ( <a href="https://github.com/nangalialab/treemut">https://github.com/nangalialab/treemut</a> ). Population trajectories were inferred using phylodyn ( <a href="https://github.com/mdkarcher/phylodyn">https://github.com/mdkarcher/phylodyn</a> ). Bayesian inferences utilized the packages rsimpop ( <a href="https://github.com/nangalialab/rsimpop">https://github.com/nangalialab/rsimpop</a> ) for simulations and abc (version 2.2.1, <a href="https://CRAN.R-project.org/package=abc">https://CRAN.R-project.org/package=abc</a> ) for approximate Bayesian Computation. Mutation signatures were inferred using the hdp ( <a href="https://github.com/nicolaroberts/hdp">https://github.com/nicolaroberts/hdp</a> ) and sigfit (version 2.2.0, <a href="https://github.com/kgori/sigfit">https://github.com/kgori/sigfit</a> ). Duplex consensus reads were generated using the fgbio suite of tools (version 1.5.1-2.1.0, <a href="http://fulcrumgenomics.github.io/fgbio/">http://fulcrumgenomics.github.io/fgbio/</a> ). dN/dS ratios were calculated using dNdScv (version 0.1.0, <a href="https://github.com/im3sanger/dndscv">https://github.com/im3sanger/dndscv</a> ). Custom DNA baitsets were designed using the Agilent SureDesign tool (version 7.10.2). Population genetic analyses of clone sizes and parameter inferences were based on code available at <a href="https://github.com/blundellab/ClonalHematopoiesis/">https://github.com/blundellab/ClonalHematopoiesis/</a> . Other analyses were carried out using custom R scripts (R version 4.3) and will be available at <a href="https://github.com/CDKapidia/somatic-mouse">https://github.com/CDKapidia/somatic-mouse</a> . |

For manuscripts utilizing custom algorithms or software that are central to the research but not yet described in published literature, software must be made available to editors and reviewers. We strongly encourage code deposition in a community repository (e.g. GitHub). See the Nature Portfolio [guidelines for submitting code & software](#) for further information.

## Data

Policy information about [availability of data](#)

All manuscripts must include a [data availability statement](#). This statement should provide the following information, where applicable:

- Accession codes, unique identifiers, or web links for publicly available datasets
- A description of any restrictions on data availability
- For clinical datasets or third party data, please ensure that the statement adheres to our [policy](#)

Whole genome sequencing data will be deposited at the European Nucleotide Archive at accession numbers ERP138320, ERP152795, and ERP144323. Targeted duplex sequencing data has been deposited at NCBI BioProject PRJNA1033340.

## Research involving human participants, their data, or biological material

Policy information about studies with [human participants or human data](#). See also policy information about [sex, gender \(identity/presentation\), and sexual orientation](#) and [race, ethnicity and racism](#).

Reporting on sex and gender

Reporting on race, ethnicity, or other socially relevant groupings

Population characteristics

Recruitment

Ethics oversight

Note that full information on the approval of the study protocol must also be provided in the manuscript.

## Field-specific reporting

Please select the one below that is the best fit for your research. If you are not sure, read the appropriate sections before making your selection.

☒ Life sciences ☐ Behavioural & social sciences ☐ Ecological, evolutionary & environmental sciences

For a reference copy of the document with all sections, see [nature.com/documents/nr-reporting-summary-flat.pdf](https://www.nature.com/documents/nr-reporting-summary-flat.pdf)

## Life sciences study design

All studies must disclose on these points even when the disclosure is negative.

Sample size

Data exclusions

Replication

Randomization

Blinding

## Reporting for specific materials, systems and methods

We require information from authors about some types of materials, experimental systems and methods used in many studies. Here, indicate whether each material, system or method listed is relevant to your study. If you are not sure if a list item applies to your research, read the appropriate section before selecting a response.

## Materials & experimental systems

| n/a                                 | Involved in the study                                           |
|-------------------------------------|-----------------------------------------------------------------|
| <input type="checkbox"/>            | <input checked="" type="checkbox"/> Antibodies                  |
| <input checked="" type="checkbox"/> | <input type="checkbox"/> Eukaryotic cell lines                  |
| <input checked="" type="checkbox"/> | <input type="checkbox"/> Palaeontology and archaeology          |
| <input type="checkbox"/>            | <input checked="" type="checkbox"/> Animals and other organisms |
| <input checked="" type="checkbox"/> | <input type="checkbox"/> Clinical data                          |
| <input checked="" type="checkbox"/> | <input type="checkbox"/> Dual use research of concern           |
| <input checked="" type="checkbox"/> | <input type="checkbox"/> Plants                                 |

## Methods

| n/a                                 | Involved in the study                              |
|-------------------------------------|----------------------------------------------------|
| <input checked="" type="checkbox"/> | <input type="checkbox"/> ChIP-seq                  |
| <input type="checkbox"/>            | <input checked="" type="checkbox"/> Flow cytometry |
| <input checked="" type="checkbox"/> | <input type="checkbox"/> MRI-based neuroimaging    |

## Antibodies

### Antibodies used

- FACS: anti-CD150-Bright Violet 711 (Biolegend, catalog number 115941, clone TC15-12F12.2, 1:50)
- FACS: anti-CD48-FITC (eBioscience, catalog number 11-0481-82, clone HM48-1, 1:100)
- FACS: anti-CD117-APC (eBioscience, catalog number 17-1171-83, clone 2B8, 1:100)
- FACS: anti-FLT3-PE (eBioscience, catalog number 12-1351-82, clone A2F10, 1:50)
- FACS: anti-Sca1-PE-Cy7 (eBioscience, catalog number 25-5981-82, clone D7, 1:100)
- FACS: anti-Ter119-eFlour-450 (eBioscience, catalog number 48-5921-82, clone Ter119, 1:100)
- FACS: anti-Gr1-eFlour-450 (eBioscience, catalog number 48-5931-82, clone RB6-8C5, 1:100)
- FACS: anti-CD8a-eFlour-450 (Invitrogen, catalog number 48-0081-82, clone 53-6.7, 1:100)
- FACS: anti-Mac1-eFlour-450 (eBioscience, catalog number 48-0112-82, clone M1/70, 1:100)
- FACS: anti-CD4-eFlour-450 (eBioscience, catalog number 48-0041-82, clone GK1.9, 1:100)
- FACS: anti-B220-eFlour-450 (eBioscience, catalog number 48-0452-82, clone 48-0452-82., 1:100)

### Validation

All antibodies are from commercial vendors and have been validated by the manufacturer with supporting publications found on the manufacturer's website for each antibody. See below for summary:

FACS: anti-CD150-Bright Violet 711 (Biolegend, catalog number 115941, clone TC15-12F12.2, 1:50)

Species: Mouse

Application: FACS

FACS: anti-CD48-FITC (eBioscience, catalog number 11-0481-82, clone HM48-1, 1:100)

Species: Mouse

Application: FACS

FACS: anti-CD117-APC (eBioscience, catalog number 17-1171-83, clone 2B8, 1:100)

Species: Mouse

Application: FACS

FACS: anti-FLT3-PE (eBioscience, catalog number 12-1351-82, clone A2F10, 1:50)

Species: Mouse

Application: FACS

FACS: anti-Sca1-PE-Cy7 (eBioscience, catalog number 25-5981-82, clone D7, 1:100)

Species: Mouse

Application: FACS

FACS: anti-Ter119-eFlour-450 (eBioscience, catalog number 48-5921-82, clone Ter119, 1:100)

Species: Mouse

Application: FACS

FACS: anti-Gr1-eFlour-450 (eBioscience, catalog number 48-5931-82, clone RB6-8C5, 1:100)

Species: Mouse

Application: FACS

FACS: anti-CD8a-eFlour-450 (Invitrogen, catalog number 48-0081-82, clone 53-6.7, 1:100)

Species: Mouse

Application: FACS

FACS: anti-Mac1-eFlour-450 (eBioscience, catalog number 48-0112-82, clone M1/70, 1:100)

Species: Mouse

Application: FACS

FACS: anti-CD4-eFlour-450 (eBioscience, catalog number 48-0041-82, clone GK1.9, 1:100)

Species: Mouse

Application: FACS

FACS: anti-B220-eFlour-450 (eBioscience, catalog number 48-0452-82, clone 48-0452-82., 1:100)  
 Species: Mouse  
 Application: FACS

## Animals and other research organisms

Policy information about [studies involving animals](#); [ARRIVE guidelines](#) recommended for reporting animal research, and [Sex and Gender in Research](#)

### Laboratory animals

Mouse strain, age, and sex is described in the manuscript text, legends, and methods. All mice were C57BL/6, C57BL/6J:FVB/NJ F1 hybrid mice, or HET3 mice. Mouse age ranged from 3 months to 36 months, as described in the manuscript. Wild-type C57BL/6 mice were bred at Baylor College of Medicine or received from the Aged Rodent Colony at the National Institute of Aging (Baltimore, MD). C57BL/6J:FVB/NJ F1 hybrid mice were bred in the Niedernhofer laboratory at the University of Minnesota. HET3 mice were bred at the Jackson Laboratories. C57BL/6 were housed at the AAALAC-approved Center for Comparative Medicine in BSL-2 suites. Mice were housed with the same sex in ventilated cages, under a 14/10-hour light-dark cycle with temperature and humidity control, enrichment material, and fed ad libitum with a standard chow diet.

### Wild animals

No wild animals were used in this study.

### Reporting on sex

Duplex sequencing experiment used a mix of male and female mice because clonal hematopoiesis occurs in both sexes. For whole genome colony data, all mice were female.

### Field-collected samples

No field collected samples were used for this study.

### Ethics oversight

Experimental procedures were approved by the Baylor College of Medicine or University of Minnesota Institutional Animal Care and Use Committees and performed following the Office of Laboratory Animal Welfare guidelines and PHS Policy on Use of Laboratory Animals.

Note that full information on the approval of the study protocol must also be provided in the manuscript.

## Plants

### Seed stocks

No plants were used in this study.

### Novel plant genotypes

No plants were used in this study.

### Authentication

No plants were used in this study.

## Flow Cytometry

### Plots

Confirm that:

- ☒ The axis labels state the marker and fluorochrome used (e.g. CD4-FITC).
- ☒ The axis scales are clearly visible. Include numbers along axes only for bottom left plot of group (a 'group' is an analysis of identical markers).
- ☒ All plots are contour plots with outliers or pseudocolor plots.
- ☒ A numerical value for number of cells or percentage (with statistics) is provided.

### Methodology

#### Sample preparation

Whole bone marrow (WBM) cells were isolated from murine hindlimbs and enriched for c-Kit<sup>+</sup> hematopoietic progenitors prior to fluorescence-activated cell sorting (FACS). WBM was incubated with anti-CD117 microbeads (Miltenyi) for 30 minutes at 4°C following my magnetic column enrichment (LS Columns, Miltenyi). HSCs were defined as Lineage<sup>−</sup>ckit<sup>+</sup>Sca-1<sup>+</sup>FLT-3<sup>−</sup>CD48<sup>−</sup>CD150<sup>+</sup>; MPPs were defined as Lineage<sup>−</sup>ckit<sup>+</sup>Sca-1<sup>+</sup>FLT-3<sup>−</sup>CD48<sup>−</sup>CD150<sup>−</sup>. The gating strategy is illustrated in Extended Data Fig. 1A.

#### Instrument

FACS was completed on a BD FACSAriaII.

#### Software

Flow cytometry data was collected using BD FACSDiva version 9.0 and analyzed using FlowJo version 10.8.1.

Cell population abundance

Cell population abundance is described in Figure 3b and Extended Data 1A.

Gating strategy

Gating strategy is describing in Extended Data 1A.

☒ Tick this box to confirm that a figure exemplifying the gating strategy is provided in the Supplementary Information.
